# Supplementary material for: Case report: Congenital arterioportal fistula: An unusual cause of variceal bleeding in adults
Source: Frontiers journal article supplement (doi:10.3389/fmed.2022.970254), 2022-09-07

**Fig. S1**

Case Progress Timeline

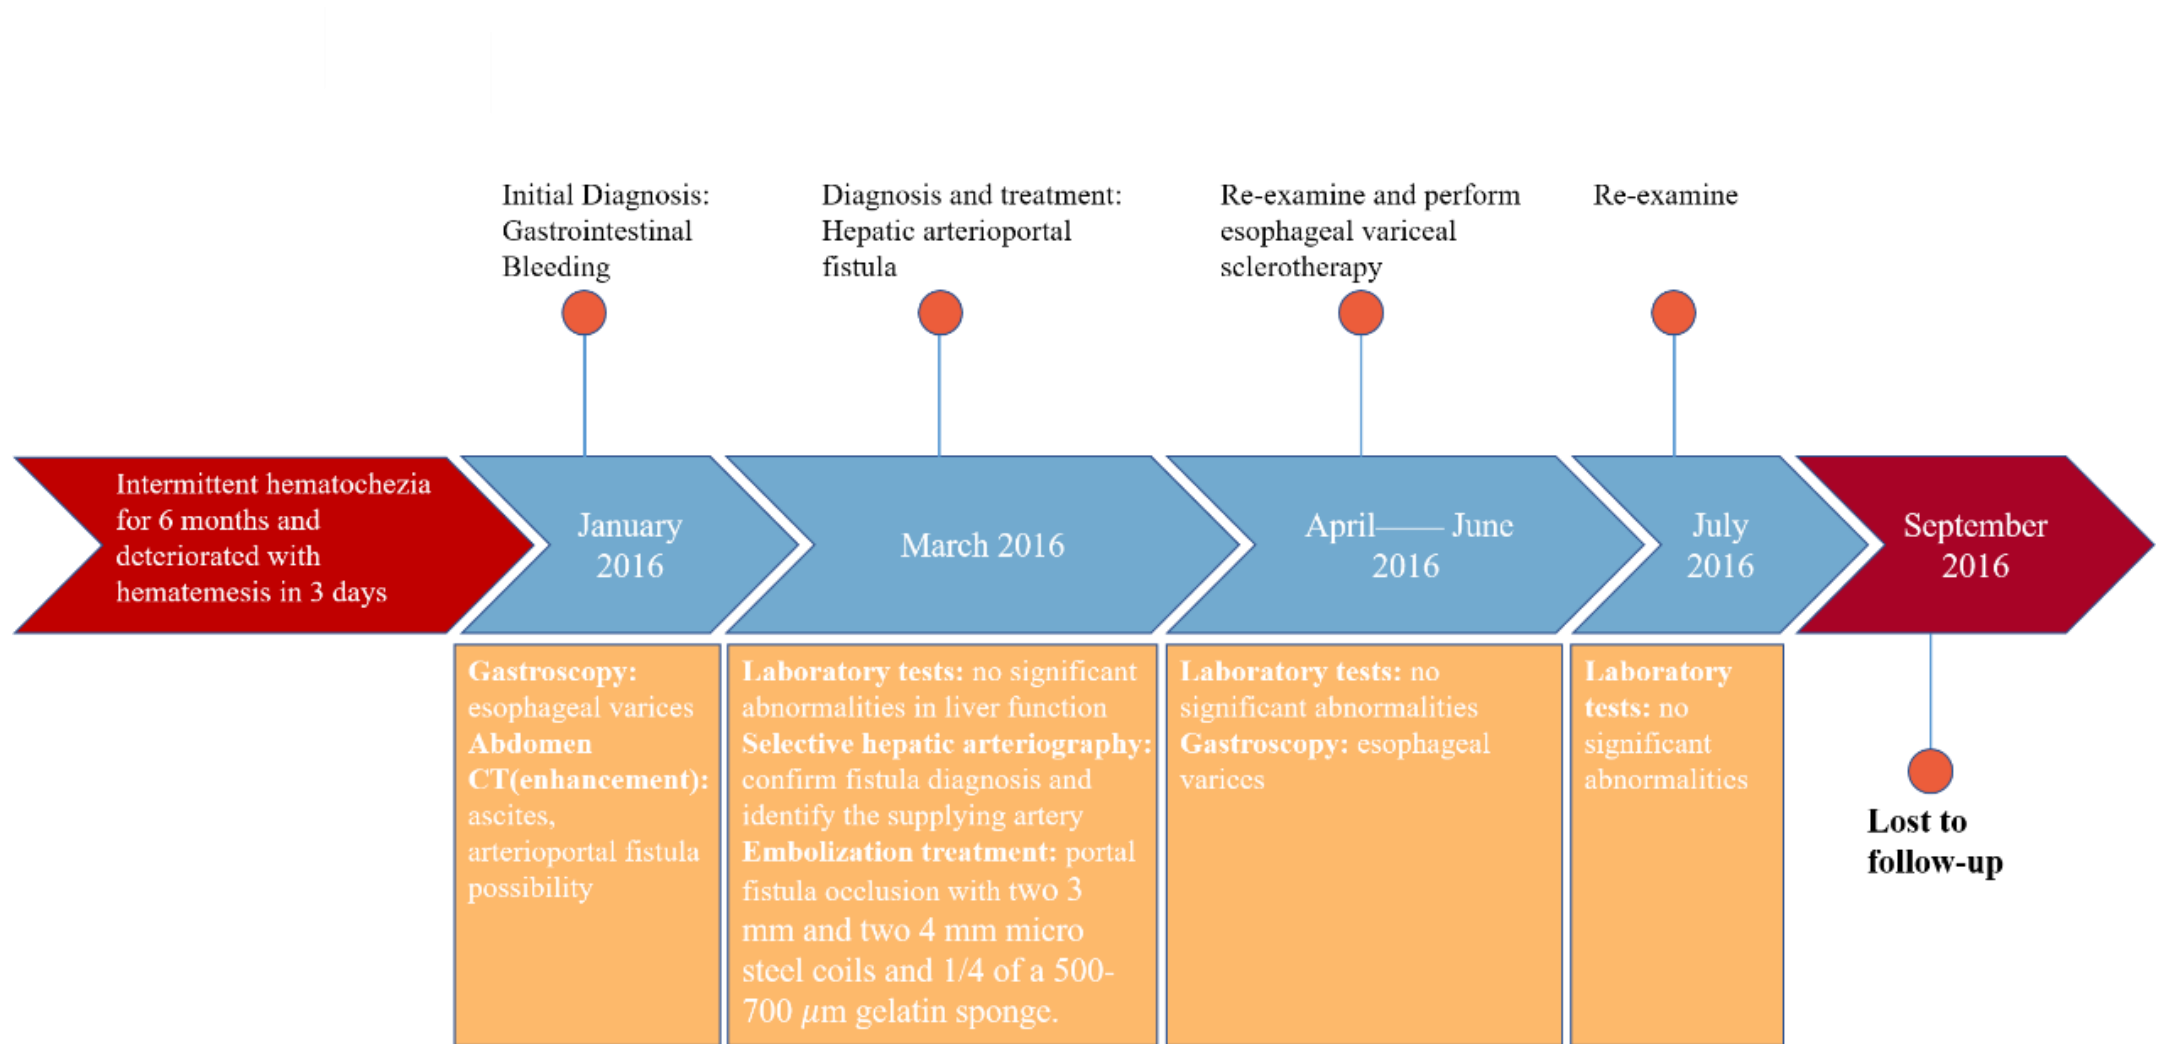

Supplement: Image_1.pdf [file Image_1.pdf]
